# Supplementary material for: Opposing Effects of Nutritional Supply on Bone Health at Different Ages: Based on the National Health and Nutrition Examination Survey Database
Source: MDPI journal article supplement (doi:10.3390/nu16060758), 2024-03-07
Supplement: s1 [file s1]

## Opposing Effects of Nutritional Supply on Bone Health at Different Ages: Based on the NHANES Database

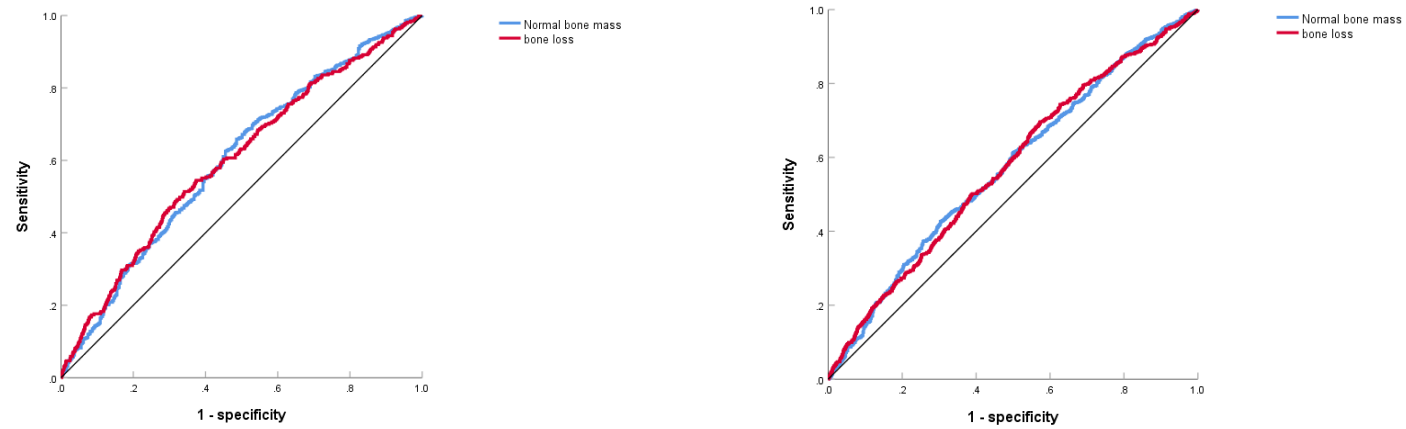

**Supplementary Figure S1:** ROC curves of neural network models at different age stages.

Opposing Effects of Nutritional Supply on Bone Health at Different Ages: Based on the NHANES Database  
**Supplementary Table S1.** Logistic regression analysis of bone status in research subjects of different age groups (modal 2).

|                         | b      | Sb    | Wald $\chi^2$ | p-Value | OR    | 95% CI |         |
|-------------------------|--------|-------|---------------|---------|-------|--------|---------|
|                         |        |       |               |         |       | lowest | highest |
| ≤20 years               |        |       |               |         |       |        |         |
| vitamin B <sub>2</sub>  | −0.098 | 0.071 | 1.943         | 0.163   | 0.906 | 0.789  | 1.041   |
| vitamin B <sub>6</sub>  | 0.012  | 0.009 | 1.788         | 0.181   | 1.012 | 0.995  | 1.029   |
| Niacin                  | 0.001  | 0.105 | 0             | 0.996   | 1.001 | 0.815  | 1.228   |
| vitamin B <sub>12</sub> | 0      | 0.015 | 0             | 0.995   | 1     | 0.971  | 1.03    |
| Carbohydrates stage     |        |       |               |         |       |        |         |
| Appropriate             |        |       | 1.724         | 0.422   |       |        |         |
| low                     | 0.233  | 0.247 | 0.89          | 0.346   | 1.263 | 0.778  | 2.05    |
| high                    | 0.077  | 0.252 | 0.092         | 0.761   | 1.08  | 0.659  | 1.769   |
| Protein stage           |        |       |               |         |       |        |         |
| Appropriate             |        |       | 3.017         | 0.221   |       |        |         |
| low                     | 0.193  | 0.142 | 1.851         | 0.174   | 1.212 | 0.919  | 1.6     |
| high                    | −0.068 | 0.225 | 0.09          | 0.764   | 0.935 | 0.601  | 1.453   |
| HFD stage               |        |       |               |         |       |        |         |
| Appropriate             |        |       |               |         |       |        |         |
| high                    | 1.388  | 0.728 | 3.632         | 0.057   | 4.007 | 0.961  | 16.699  |
| constant                | −3.367 | 0.781 | 18.572        | 0       | 0.034 |        |         |
| <20 years               |        |       |               |         |       |        |         |
| vitamin B <sub>2</sub>  | 0.142  | 0.053 | 7.327         | 0.007   | 1.153 | 1.04   | 1.278   |
| vitamin B <sub>6</sub>  | 0.004  | 0.007 | 0.299         | 0.584   | 1.004 | 0.991  | 1.017   |
| Niacin                  | −0.172 | 0.075 | 5.236         | 0.022   | 0.842 | 0.726  | 0.976   |

|                         |        |       |         |       |       |       |       |
|-------------------------|--------|-------|---------|-------|-------|-------|-------|
| vitamin B <sub>12</sub> | −0.003 | 0.006 | 0.16    | 0.689 | 0.997 | 0.985 | 1.01  |
| Carbohydrates stage     |        |       |         |       |       |       |       |
| Appropriate             |        |       | 5.718   | 0.057 |       |       |       |
| low                     | −0.117 | 0.12  | 0.96    | 0.327 | 0.889 | 0.703 | 1.124 |
| high                    | 0.291  | 0.186 | 2.456   | 0.117 | 1.338 | 0.93  | 1.926 |
| Protein stage           |        |       |         |       |       |       |       |
| Appropriate             |        |       | 2.066   | 0.356 |       |       |       |
| low                     | 0.214  | 0.159 | 1.821   | 0.177 | 1.239 | 0.908 | 1.691 |
| high                    | −0.01  | 0.104 | 0.009   | 0.924 | 0.99  | 0.807 | 1.214 |
| HFD stage               |        |       |         |       |       |       |       |
| Appropriate             |        |       |         |       |       |       |       |
| high                    | −0.051 | 0.272 | 0.035   | 0.852 | 0.95  | 0.558 | 1.62  |
| constant                | −1.722 | 0.138 | 156.168 | 0     | 0.179 |       |       |

**Supplementary Table S2.** Logistic regression analysis of bone status in research subjects of different age groups (modal 3).

|                              | b       | Sb       | Wald $\chi^2$ | p-Value | OR                    | 95% CI                |                       |
|------------------------------|---------|----------|---------------|---------|-----------------------|-----------------------|-----------------------|
|                              |         |          |               |         |                       | lowest                | highest               |
| ≤20 years                    |         |          |               |         |                       |                       |                       |
| home PIR                     | −0.087  | 0.059    | 2.179         | 0.14    | 0.916                 | 0.816                 | 1.029                 |
| Gender                       |         |          |               |         |                       |                       |                       |
| male                         | 0       | 0.182    | 0             | 0.998   | 1                     | 0.701                 | 1.428                 |
| female                       |         |          |               |         | 1                     |                       |                       |
| Country of Birth             |         |          |               |         |                       |                       |                       |
| Mexican Americans            | 0.457   | 0.622    | 0.54          | 0.462   | 1.58                  | 0.467                 | 5.349                 |
| Other Hispanic               | −1.395  | 0.72     | 3.754         | 0.053   | 0.248                 | 0.06                  | 1.016                 |
| Non-Hispanic white           |         |          |               |         | 1                     |                       |                       |
| Citizenship                  |         |          |               |         |                       |                       |                       |
| Born or naturalized citizens | −1.392  | 0.832    | 2.795         | 0.095   | 0.249                 | 0.049                 | 1.271                 |
| Non-US citizens              |         |          |               |         | 1                     |                       |                       |
| marital status               |         |          |               |         |                       |                       |                       |
| married                      | −16.849 | 1        | 284.069       | 0       | $4.81 \times 10^{-8}$ | $6.79 \times 10^{-9}$ | $3.42 \times 10^{-7}$ |
| Widowhood                    | −0.308  | 7908.451 | 0             | 1       | 0.735                 | 0                     | $3.72 \times 10^{-7}$ |
| divorce                      | −16.886 | 1.054    | 256.449       | 0       | $4.64 \times 10^{-8}$ | $5.88 \times 10^{-9}$ | $3.67 \times 10^{-7}$ |
| separation                   | −16.648 | 0.559    | 888.32        | 0       | $5.89 \times 10^{-8}$ | $1.97 \times 10^{-8}$ | $1.76 \times 10^{-7}$ |
| Never married                | −16.363 | 0        | .             | .       | $7.83 \times 10^{-8}$ | $7.83 \times 10^{-8}$ | $7.83 \times 10^{-8}$ |
| Living with a partner        | −1.231  | 7908.451 | 0             | 1       | 0.292                 | 0                     | $7.23 \times 10^{-8}$ |

|                              |        |       |       |       |       |       |       |
|------------------------------|--------|-------|-------|-------|-------|-------|-------|
| others                       |        |       |       |       | 1     |       |       |
| Total number of households   |        |       |       |       |       |       |       |
| 1                            | 0.705  | 0.951 | 0.55  | 0.458 | 2.023 | 0.728 | 4.255 |
| 2                            | 0.565  | 0.45  | 1.575 | 0.209 | 1.76  | 0.91  | 4.059 |
| 3                            | 0.653  | 0.381 | 2.932 | 0.087 | 1.922 | 0.879 | 3.384 |
| 4                            | 0.545  | 0.344 | 2.515 | 0.113 | 1.725 | 0.698 | 2.477 |
| 5                            | 0.274  | 0.323 | 0.72  | 0.396 | 1.315 | 0.781 | 3.261 |
| 6                            | 0.467  | 0.365 | 1.641 | 0.2   | 1.596 | .     | .     |
| >6                           |        |       |       |       | 1     |       |       |
| high-fat diet                |        |       |       |       |       |       |       |
| Appropriate                  | -0.573 | 0.271 | 4.48  | 0.034 | 0.564 | 0.331 | 0.958 |
| high                         |        |       |       |       | 1     |       |       |
| Total Fat(g)                 | -0.013 | 0.01  | 1.708 | 0.191 | 0.987 | 0.968 | 1.007 |
| Energy(kcal)                 | 0      | 0.001 | 0.097 | 0.756 | 1     | 0.998 | 1.001 |
| Carbohydrates(g)             | 0.003  | 0.003 | 0.781 | 0.377 | 1.003 | 0.997 | 1.008 |
| Protein(g)                   | -0.005 | 0.006 | 0.709 | 0.4   | 0.995 | 0.984 | 1.007 |
| Dietary fiber(g)             | -0.031 | 0.015 | 4.068 | 0.044 | 0.97  | 0.941 | 0.999 |
| Total Saturated fat acids(g) | 0.033  | 0.019 | 3.191 | 0.074 | 1.034 | 0.997 | 1.072 |
| Cholesterol(mg)              | 0.001  | 0.001 | 4.001 | 0.045 | 1.001 | 1     | 1.003 |
| Vitamin C (mg)               | 0      | 0.001 | 0.133 | 0.716 | 1     | 0.999 |       |
| Vitamin K(μg)                | 0.001  | 0.001 | 0.636 | 0.425 | 1.001 | 0.998 | 1.002 |
| Calcium(mg)                  | 0      | 0     | 0.051 | 0.821 | 1     | 0.999 | 1.004 |
| Phosphorus(mg)               | 0      | 0     | 0.114 | 0.736 | 1     | 0.999 | 1.001 |

|                         |        |       |       |       |       |       |       |
|-------------------------|--------|-------|-------|-------|-------|-------|-------|
| Magnesium(mg)           | 0.001  | 0.002 | 0.082 | 0.775 | 1.001 | 0.997 | 1.001 |
| Iron(mg)                | −0.019 | 0.014 | 1.758 | 0.185 | 0.982 | 0.955 | 1.004 |
| Zinc(mg)                | −0.008 | 0.017 | 0.23  | 0.631 | 0.992 | 0.958 | 1.009 |
| Copper(mg)              | 0.524  | 0.335 | 2.446 | 0.118 | 1.689 | 0.876 | 1.026 |
| Sodium (mg)             | 0      | 0     | 0.307 | 0.58  | 1     | 1     | 3.255 |
| vitamin E               | −0.013 | 0.03  | 0.201 | 0.654 | 0.987 | 0.93  | 1.047 |
| vitamin A               | −0.001 | 0     | 2.142 | 0.143 | 0.999 | 0.999 | 1     |
| vitamin B <sub>1</sub>  | 0.121  | 0.224 | 0.293 | 0.588 | 1.129 | 0.728 | 1.751 |
| vitamin B <sub>2</sub>  | −0.349 | 0.196 | 3.171 | 0.075 | 0.705 | 0.48  | 1.036 |
| Niacin                  | 0.061  | 0.021 | 8.097 | 0.004 | 1.062 | 1.019 | 1.108 |
| vitamin B <sub>6</sub>  | −0.466 | 0.22  | 4.507 | 0.034 | 0.627 | 0.408 | 0.965 |
| FA                      | −0.001 | 0.001 | 3.66  | 0.056 | 0.999 | 0.997 | 1     |
| vitamin B <sub>12</sub> | 0      | 0.023 | 0     | 0.983 | 1     | 0.955 | 1.047 |
| vitamin C               | −0.001 | 0.001 | 0.587 | 0.444 | 0.999 | 0.997 | 1.001 |
| vitamin K               | 0.001  | 0.001 | 0.2   | 0.655 | 1.001 | 0.998 | 1.003 |
| vitamin E               | −0.013 | 0.03  | 0.201 | 0.654 | 0.987 | 0.93  | 1.047 |
| vitamin A               | −0.001 | 0     | 2.142 | 0.143 | 0.999 | 0.999 | 1     |

|                       |         |        |         |       |                       |                       |                       |
|-----------------------|---------|--------|---------|-------|-----------------------|-----------------------|-----------------------|
| <20 years             |         |        |         |       |                       |                       |                       |
| home PIR              | 0.028   | 0.043  | 0.444   | 0.505 | 1.029                 | 0.946                 | 1                     |
| Gender                |         |        |         |       |                       |                       |                       |
| male                  | 0.1     | 0.137  | 0.531   | 0.466 | 1.105                 | 0.845                 | 1                     |
| female                |         |        |         |       |                       |                       |                       |
| Country of Birth      |         |        |         |       |                       |                       |                       |
| Mexican Americans     | 0.457   | 0.622  | 0.54    | 0.462 | 1.58                  | 0.467                 | .                     |
| Other Hispanic        | -1.395  | 0.72   | 3.754   | 0.053 | 0.248                 | 0.06                  | 5.349                 |
| Non-Hispanic white    |         |        |         |       |                       |                       |                       |
| Citizenship           |         |        |         |       |                       |                       |                       |
| Born or naturalized   |         |        |         |       |                       |                       |                       |
| citizens              | -1.392  | 0.832  | 2.795   | 0.095 | 0.249                 | 0.049                 | .                     |
| Non-US citizens       |         |        |         |       |                       |                       |                       |
| marital status        |         |        |         |       |                       |                       |                       |
| married               | -16.849 | 1      | 284.069 | 0     | $4.81 \times 10^{-8}$ | $6.79 \times 10^{-9}$ | .                     |
| Widowhood             | -0.308  | 7908.4 | 0       | 1     | 0.735                 | 0                     | $3.42 \times 10^{-7}$ |
|                       |         | 51     |         |       |                       |                       |                       |
| divorce               | -16.886 | 1.054  | 256.449 | 0     | $4.64 \times 10^{-8}$ | $5.88 \times 10^{-9}$ | .C                    |
| separation            | -16.648 | 0.559  | 888.32  | 0     | $5.89 \times 10^{-8}$ | $1.97 \times 10^{-8}$ | $3.67 \times 10^{-7}$ |
| Never married         | -16.363 | 0      | .       | .     | $7.83 \times 10^{-8}$ | $7.83 \times 10^{-8}$ | $1.76 \times 10^{-7}$ |
| Living with a partner |         |        |         |       |                       |                       |                       |
| others                |         |        |         |       |                       |                       |                       |
| Total number of       |         |        |         |       |                       |                       |                       |
| households            |         |        |         |       |                       |                       |                       |
| 1                     | 0.748   | 0.813  | 0.847   | 0.357 | 2.113                 | 0.43                  | .                     |

|                     |        |       |       |       |       |       |        |
|---------------------|--------|-------|-------|-------|-------|-------|--------|
| 2                   | 0.26   | 0.373 | 0.484 | 0.487 | 1.297 | 0.624 | 10.394 |
| 3                   | 0.339  | 0.323 | 1.1   | 0.294 | 1.404 | 0.745 | 2.695  |
| 4                   | 0.316  | 0.31  | 1.035 | 0.309 | 1.372 | 0.746 | 2.645  |
| 5                   | 0.017  | 0.305 | 0.003 | 0.955 | 1.017 | 0.56  | 2.52   |
| 6                   | 0.275  | 0.351 | 0.613 | 0.434 | 1.317 | 0.661 | 1.848  |
| >6                  |        |       |       |       | 1     |       |        |
| high-fat diet       |        |       |       |       |       |       |        |
| Appropriate         | -0.573 | 0.271 | 4.48  | 0.034 | 0.564 | 0.331 | 1.566  |
| high                |        |       |       |       | 1     |       |        |
| Total Fat(g)        | -0.013 | 0.01  | 1.708 | 0.191 | 0.987 | 0.968 | 1.029  |
| Energy(kcal)        | 0      | 0.001 | 0.097 | 0.756 | 1     | 0.998 | 1.007  |
| Carbohydrates(g)    | 0.003  | 0.003 | 0.781 | 0.377 | 1.003 | 0.997 | 1.001  |
| Protein(g)          | -0.005 | 0.006 | 0.709 | 0.4   | 0.995 | 0.984 | 1.008  |
| Dietary fiber(g)    | -0.031 | 0.015 | 4.068 | 0.044 | 0.97  | 0.941 | 1.007  |
| Total Saturated fat |        |       |       |       |       |       |        |
| acids(g)            | -0.998 | 2.427 | 0.169 | 0.681 | 0.369 | 0.003 | .      |
| Cholesterol(mg)     | 0.033  | 0.019 | 3.191 | 0.074 | 1.034 | 0.997 | 42.932 |
| Vitamin C (mg)      | 0.001  | 0.001 | 4.001 | 0.045 | 1.001 | 1     | 1.072  |
| Vitamin K(μg)       | 0.001  | 0.001 | 0.636 | 0.425 | 1.001 | 0.998 | 1.002  |
| Calcium(mg)         | 0      | 0     | 0.051 | 0.821 | 1     | 0.999 | 1.004  |
| Phosphorus(mg)      | 0      | 0     | 0.114 | 0.736 | 1     | 0.999 | 1.001  |
| Magnesium(mg)       | 0.001  | 0.002 | 0.082 | 0.775 | 1.001 | 0.997 | 1.001  |
| Iron(mg)            | -0.019 | 0.014 | 1.758 | 0.185 | 0.982 | 0.955 | 1.004  |
| Zinc(mg)            | -0.008 | 0.017 | 0.23  | 0.631 | 0.992 | 0.958 | 1.009  |
| Copper(mg)          | 0.524  | 0.335 | 2.446 | 0.118 | 1.689 | 0.876 | 1.026  |



|                         |        |       |        |       |       |       |       |
|-------------------------|--------|-------|--------|-------|-------|-------|-------|
| Sodium (mg)             | 0      | 0     | 0.307  | 0.58  | 1     | 1     | 3.255 |
| vitamin E               | −0.009 | 0.013 | 0.445  | 0.505 | 0.991 | 0.965 | 1.018 |
| vitamin A               | 0      | 0     | 0.188  | 0.665 | 1     | 1     | 1     |
| vitamin B <sub>1</sub>  | 0.134  | 0.083 | 2.635  | 0.105 | 1.143 | 0.973 | 1.344 |
| vitamin B <sub>2</sub>  | 0.253  | 0.08  | 10.077 | 0.002 | 1.288 | 1.102 | 1.506 |
| Niacin                  | 0.003  | 0.01  | 0.089  | 0.765 | 1.003 | 0.984 | 1.022 |
| vitamin B <sub>6</sub>  | −0.125 | 0.091 | 1.897  | 0.168 | 0.883 | 0.739 | 1.054 |
| FA                      | −0.001 | 0     | 4.546  | 0.033 | 0.999 | 0.998 | 1     |
| vitamin B <sub>12</sub> | −0.005 | 0.013 | 0.153  | 0.696 | 0.995 | 0.97  | 1.021 |
| vitamin C               | −0.001 | 0.001 | 1.403  | 0.236 | 0.999 | 0.998 | 1.001 |
| vitamin K               | 0      | 0     | 0.649  | 0.421 | 1     | 0.999 | 1.001 |
